# Supplementary material for: Suicide risk and mortality among patients with cancer
Source: Springer Nature journal article supplement (doi:10.1038/s41591-022-01745-y), 2022-03-28
Supplement: MOESM1 [file 41591_2022_1745_MOESM1_ESM_corrected_version.pdf]

**Supplementary information**

---

**Suicide risk and mortality among patients with cancer**

---

In the format provided by the authors and unedited

# Suicide risk and mortality among patients with cancer

## Supplement

Michael Heinrich, M.Sc.<sup>1</sup>, Luisa Hofmann<sup>1</sup>, Hansjörg Baurecht, PhD<sup>2</sup>, Peter M. Kreuzer, MD<sup>1</sup>, Helge Knüttel, PhD<sup>3</sup>, Michael F. Leitzmann, MD, DrPH<sup>2</sup>, and Corinna Seliger, MD, PhD<sup>4</sup>

### **Author affiliations:**

<sup>1</sup>Department of Psychiatry and Psychotherapy, University of Regensburg, Regensburg, Germany

<sup>2</sup>Department of Epidemiology and Preventive Medicine, University of Regensburg, Regensburg, Germany

<sup>3</sup>University Library, University of Regensburg, Regensburg, Germany.

<sup>4</sup>Department of Neurology, University Hospital Heidelberg, Heidelberg, Germany

**Corresponding author\* and reprint requests:** Dr. Corinna Seliger, Department of Neurology, University Hospital Heidelberg, Heidelberg, Germany; Corinna.Seliger-Behme@med.uni-heidelberg.de; 0049-6221-56-36873

## Subjects and Methods

### *Literature search and data source*

Our search strategy comprised three key concepts which were combined with the Boolean operator “AND”: suicide AND cancer AND epidemiological studies. For each of these concepts, relevant subject headings and text words were chosen to maximize the sensitivity of the search. Starting with a primary search strategy developed for Embase, subject headings and syntax were adapted for the other databases. For the suicide concept, we employed terms drawn from three Cochrane reviews<sup>1-3</sup>, for the cancer concept we employed terms from a Cochrane review<sup>4</sup>; the filter for epidemiological studies is adapted from Larney et al.<sup>5</sup>. While we had no opportunity for peer review of the search strategies, we strove to conform to the recommendations in the PRESS guideline.<sup>6</sup> No restriction regarding publication date was applied. Search results were limited to publications in English language. We searched the data sources Embase (Ovid), MEDLINE (Ovid), PsycInfo (EBSCOhost), Science Citation Index Expanded & Social Sciences Citation Index (simultaneously, Web of Science), CINAHL (EBSCOhost) and Google Scholar. We updated the searches by rerunning the strategies on February 19<sup>th</sup>, 2021. The full search strategies with exact dates of searching are documented in Supplementary Table 5. We screened the reference lists of included articles for additional studies. Additionally, the authors searched their personal files. We did not search study registries, nor did we contact other authors or experts to identify additional studies.

### *Data extraction and assessment of study quality*

All records from the database searches were imported into Endnote reference management software (Version X9). In a first step, deduplication of records was performed according to the method developed and published by Bramer et al.<sup>7</sup>. In subsequent steps, first all titles and

abstracts and then full texts were screened for relevance according to the pre-defined inclusion criteria.

Extracted data were organized in worksheets using Microsoft® Excel Version 16.

### *Statistical analysis*

As outcome measure, we used SMRs as RR estimates. We calculated study specific effect estimates by  $\log(RR_i)$  with standard error  $s_i = d_i / 1.96$ , where  $d_i$  represented the maximum of  $[\log(\text{upper } 95\% \text{CI=bound of } RR_i) - \log(RR_i)]$  and  $[\log(RR_i) - \log(\text{lower } 95\% \text{CI=bound of } RR_i)]$ . When SMRs were not available, we calculated SMR values based on the observed and expected numbers of suicides with reference to the general population of the country in which the study was performed. Pooled SMRs were calculated by separate addition of the observed cases and the expected cases of each subgroup. We performed stratified analyses and random effects meta-regression to evaluate whether suicide rates among patients with cancer differed according to gender, geographic region, ethnicity, marital status, cancer site, cancer prognosis, and cancer stage. In addition, we stratified studies by year of recruitment using a threshold of the year 2000, a time point of major improvements in therapy for many cancer types (e.g., targeted therapy, immunotherapy).<sup>8</sup> Random-effects meta-regression was used based on the assumption that the subgroup effects being estimated in the different studies are not identical. Heterogeneity among risk estimates was assessed using Q-statistics and  $I^2$  statistics. Potential publication bias was investigated using funnel plots for qualitative assessment, as well as Begg's correlation and Egger's regression tests for quantitative assessment, both with a significance level of 0.1. Subgroup analyses were corrected for multiple testing.<sup>9</sup> For potentially overlapping studies, we carried out sensitivity analyses by including only the studies with the largest set of patients for each database, time period and cancer site. All statistical analyses were carried out using R statistical software, the metafor packages, with a 2-sided 5% significance level. Correction for multiple testing in subgroup analyses was addressed by using

the false discovery rate (FDR) method and is presented as q-values.<sup>9</sup> CIs and SMRs were calculated using the Mid-P exact method<sup>10</sup> implemented in R<sup>11</sup>, Versions 4.0.2 and 4.1.1.

To combine study results, we estimated overall effects using random-effects models with individual study weights  $w_i = 1/(s_i^2 + \tau^2)$ , where  $s_i^2$  represented the standard error of the study specific effect estimates and  $\tau^2$  the restricted maximum-likelihood estimate (REML) of the between study variance<sup>12</sup>.

A Wald chi-square test was used for meta-regression tests in subgroup analysis.

Heterogeneity among risk estimates was assessed using Q-statistics and  $I^2$  statistics. Potential publication bias was investigated using funnel plots for qualitative assessment, as well as Begg's<sup>13</sup> and Egger's tests<sup>14</sup> for quantitative assessment.

All statistical analyses were carried out using R statistical software, the metafor<sup>12</sup> and Evalua<sup>15</sup> packages, with a 2-sided 5% significance level.

## Tables

**Supplementary Table 1: Characteristics of the retrospective cohort studies included in the systematic review and meta-analysis (n = 47,035,065 cases) on suicide rates in patients with cancer, by date of publication.** Abbreviations: n.a., data not available; M, male patients; F, female patients; MF, male and female patients; PY, person-years; Data in bold and italic letters were calculated by the authors.

| First author     | Year | Country                               | Time of recruitment | SMR (95% CI)                     |
|------------------|------|---------------------------------------|---------------------|----------------------------------|
| Louhivuori       | 1979 | Finland                               | 1955-1965           | <b><i>1.39 (1.07 - 1.76)</i></b> |
| Allebeck         | 1989 | Sweden                                | 1962-1979           | <b><i>1.83 (1.71 - 1.95)</i></b> |
| Allebeck         | 1991 | Sweden                                | 1975-1985           | <b><i>2.50 (2.12 - 2.94)</i></b> |
| Levi             | 1991 | Switzerland                           | 1976-1987           | 2.58 (1.95 - 3.38)               |
| Crocetti         | 1998 | Tuscany, Italy                        | 1985-1994           | 2.36 (1.69 - 3.20)               |
| Tanaka           | 1999 | Osaka, Japan                          | 1978-1994           | 1.35 (0.99 - 1.79)               |
| Innos            | 2003 | Estonia                               | 1983-1998           | <b><i>1.09 (0.95 - 1.26)</i></b> |
| Hem              | 2004 | Norway                                | 1960-1997           | 1.48 (1.37 - 1.61)               |
| Miccinesi        | 2004 | Central Italy                         | 1985-1999           | <b><i>1.93 (1.58 - 2.33)</i></b> |
| Björkenstam      | 2005 | Sweden                                | 1965-1999           | 2.05 (1.76 - 2.37)               |
| Yousaf           | 2005 | Denmark                               | 1971-2000           | <b><i>1.55 (1.47 - 1.64)</i></b> |
| Muff-Christensen | 2006 | Denmark                               | 1971-1999           | <b><i>1.09 (0.97 - 1.23)</i></b> |
| Schairer         | 2006 | USA, Sweden, Denmark, Finland, Norway | 1953-2001           | 1.37 (1.28 - 1.47)               |
| Dormer           | 2008 | West Australia                        | 1981-2002           | 1.61 (1.36 - 1.92)               |
| Misono           | 2008 | USA                                   | 1973-2002           | 1.88 (1.83 - 1.93)               |
| Fang             | 2009 | USA                                   | 1979-2004           | 1.40 (1.20 - 1.60)               |
| Robinson         | 2009 | South East England                    | 1996-2005           | 1.36 (1.16 - 1.58)               |
| Ahn              | 2010 | Korea                                 | 1993-2005           | 2.00 (1.91 - 2.08)               |
| Bill-Axelsson    | 2010 | Sweden                                | 1997-2006           | 1.51 (1.26 - 1.80)               |
| Mahdi            | 2011 | USA                                   | 1988-2007           | 1.40 (1.20 - 1.70)               |
| Turaga           | 2011 | USA                                   | 1995-2005           | 10.80 (9.20 - 12.70)             |
| Alanee           | 2012 | USA                                   | 1995-2008           | 1.20 (1.10 - 2.10)               |
| Nasseri          | 2012 | USA                                   | 1997-2006           | 1.97 (1.86 - 2.08)               |
| Beard            | 2013 | USA                                   | 1973-2001           | 1.45 (1.06 - 1.98)               |
| Njei             | 2013 | USA                                   | 1990-2009           | 4.30 (3.30 - 5.50)               |
| Smailyte         | 2013 | Lithuania                             | 2001-2009           | <b><i>1.41 (1.23 - 1.60)</i></b> |
| Urban            | 2013 | USA                                   | 1973-2008           | 4.95 (4.68 - 5.24)               |
| Oberaigner       | 2014 | Tyrol                                 | 1991-2010           | 1.86 (1.57 - 2.19)               |
| Kam              | 2015 | USA                                   | 1973-2011           | 3.21 (2.18 - 4.23)               |
| Klaasen          | 2015 | USA                                   | 1988-2010           | <b><i>1.54 (1.48 - 1.60)</i></b> |
| Vyssoki          | 2015 | Austria                               | 1983-2000           | 1.23 (1.19 - 1.28)               |
| Klaasen          | 2016 | USA                                   | 1988-2010           | 2.71 (2.02 - 3.62)               |
| Siracuse         | 2016 | USA                                   | 1973-2013           | 2.43 (1.58 - 3.28)               |
| Sugawara         | 2016 | USA                                   | 1998-2011           | 4.07 (3.18 - 5.13)               |
| Bowden           | 2017 | USA                                   | 1973-2013           | 3.21 (2.80 - 3.67)               |
| Kaceniene        | 2017 | Lithuania                             | 1993-2012           | 1.31 (1.21 - 1.41)               |
| Lin              | 2017 | Taiwan                                | 1985-2007           | 2.47 (2.38 - 2.57)               |

|                       |      |                                                            |                       |                           |
|-----------------------|------|------------------------------------------------------------|-----------------------|---------------------------|
| <b>Simpson</b>        | 2017 | USA                                                        | 1973 -2013            | 1.58 (1.18 - 2.11)        |
| <b>Kumar</b>          | 2017 | USA                                                        | 2000-2013             | <i>1,37 (1,30 - 1,40)</i> |
| <b>Anderson</b>       | 2018 | USA                                                        | 2000-2014             | 1.91 (1.79 - 2.04)        |
| <b>Henson</b>         | 2018 | England                                                    | 1995-2015             | 1.20 (1.16 - 1.25)        |
| <b>Osazuwa-Peters</b> | 2018 | USA                                                        | 1973-2014             | <b>2.74 (2.57 - 2.91)</b> |
| <b>Rahouma</b>        | 2018 | USA                                                        | 1973-2013             | 1.57 (1.53 - 1.61)        |
| <b>Saad</b>           | 2018 | USA                                                        | 2000-2015             | <b>1.42 (1.38 - 1.46)</b> |
| <b>Smith</b>          | 2018 | New South Wales, Australia                                 | 1997-2007             | 1.70 (1.26 - 2.25)        |
| <b>Kaceniene</b>      | 2018 | Lithuania                                                  | 1998-2012             | <i>2.17 (1.60 - 2.95)</i> |
| <b>Dulskas</b>        | 2019 | Lithuania                                                  | 1998-2012             | 1.62 (1.27 - 2.06)        |
| <b>Zaorsky</b>        | 2019 | USA                                                        | 1973-2014             | 4.44 (4.33 - 4.55)        |
| <b>Abdel-Rahman</b>   | 2019 | USA                                                        | 2000-2010             | 1.29 (1.25 - 1.33)        |
| <b>Anderson</b>       | 2019 | USA                                                        | 1973-2015             | 1.23 (1.13 - 1.34)        |
| <b>Guo</b>            | 2019 | USA                                                        | 1973-2015             | 1.83 (1.59 - 2.10)        |
| <b>Kim</b>            | 2019 | Germany, Switzerland, Netherlands, Czech Republic, Austria | 1993-2009             | 1.63 (1.01 - 2.50)        |
| <b>Low</b>            | 2019 | USA                                                        | 1973-2015             | 5.80 (4.25 - 7.74)        |
| <b>Patasius</b>       | 2019 | Lithuania                                                  | 2003-2012             | 1.23 (0.93 - 1.63)        |
| <b>Chen</b>           | 2020 | USA                                                        | 1975-2016             | 2.26 (1.78 - 2.84)        |
| <b>Oh</b>             | 2020 | South Korea                                                | 2000-2016             | <b>1.61 (1.56 - 1.66)</b> |
| <b>Patasius</b>       | 2020 | Lithuania                                                  | 2000-2011             | 1.10 (0.85 - 1.20)        |
| <b>Ravaioli</b>       | 2020 | Italy                                                      | 1996-2014             | 1.50 (1.30 - 1.80)        |
| <b>Saad</b>           | 2020 | USA                                                        | 2000-2016             | <b>1.63 (1.26 - 2.07)</b> |
| <b>Shen</b>           | 2020 | USA                                                        | 1980-2016             | 7.64 (6.28 - 9.21)        |
| <b>Zhai</b>           | 2020 | USA                                                        | 2014-2015             | 1.75 (1.04 - 2.77)        |
| <b>Harashima</b>      | 2021 | Japan                                                      | 01.01.2016-30.06.2016 | 2.68 (2.26 - 3.16)        |

| <b>First author</b> | <b>Gender</b> | <b>Cancer site</b>                        | <b>Study population</b> | <b>Suicide cases</b> | <b>Cases per 100,000 PY</b> | <b>Follow-up [PY]</b> |
|---------------------|---------------|-------------------------------------------|-------------------------|----------------------|-----------------------------|-----------------------|
| <b>Louhivuori</b>   | MF            | Multiple sites                            | 28,857                  | 63                   | 23.50                       | n.a.                  |
| <b>Allebeck</b>     | MF            | Multiple sites                            | 424,127                 | 963                  | n.a.                        | n.a.                  |
| <b>Allebeck</b>     | MF            | Multiple sites                            | 59,845                  | 144                  | n.a.                        | n.a.                  |
| <b>Levi</b>         | MF            | All sites except non-melanoma skin cancer | 24,166                  | 55                   | n.a.                        | 57,164                |
| <b>Crocetti</b>     | MF            | All sites except non-melanoma skin cancer | 27,123                  | 41                   | 45.99                       | 89,158                |
| <b>Tanaka</b>       | MF            | Multiple sites                            | 23,979                  | 48                   | n.a.                        | 109,374               |
| <b>Innos</b>        | MF            | Multiple sites                            | 65,419                  | 197                  | n.a.                        | 192,078               |

|                         |    |                                            |           |       |        |            |
|-------------------------|----|--------------------------------------------|-----------|-------|--------|------------|
| <b>Hem</b>              | MF | Multiple sites                             | 490,245   | 589   | n.a.   | 2,536,152  |
| <b>Miccinesi</b>        | MF | All sites except non-melanoma skin cancer  | 90,197    | 102   | n.a.   | 308,526    |
| <b>Björkenstam</b>      | MF | Multiple sites                             | 1,031,919 | 2,112 | n.a.   | 2,587,152  |
| <b>Yousaf</b>           | MF | All sites except non-melanoma skin cancer  | 564,508   | 1,241 | n.a.   | 2,232,541  |
| <b>Muff-Christensen</b> | MF | Non-melanoma skin cancer                   | 91,310    | 284   | n.a.   | 647,886    |
| <b>Schairer</b>         | F  | Breast                                     | 723,810   | 836   | n.a.   | 5,598,156  |
| <b>Dormer</b>           | MF | Multiple sites                             | 121,533   | 129   | n.a.   | 543,696    |
| <b>Misono</b>           | MF | Multiple sites                             | 3,594,750 | 5,838 | 31.40  | 18,604,308 |
| <b>Fang</b>             | M  | Prostate                                   | 342,497   | 148   | 50.00  | n.a.       |
| <b>Robinson</b>         | MF | Multiple sites                             | 417,572   | 166   | n.a.   | n.a.       |
| <b>Ahn</b>              | MF | Multiple sites                             | 816,295   | 2,065 | 68.70  | 3,007,294  |
| <b>Bill-Axelson</b>     | M  | Prostate                                   | 77,439    | 128   | 48.30  | n.a.       |
| <b>Mahdi</b>            | F  | Gynecologic system                         | 252,235   | 100   | 8,3    | 1,207,278  |
| <b>Turaga</b>           | MF | Pancreas (excluding neuroendocrine tumors) | 36,221    | 30    | 135.50 | 22,145     |
| <b>Alanee</b>           | M  | Testicular                                 | 23,381    | 33    | 26.00  | 126,762    |
| <b>Nasseri</b>          | MF | Multiple sites                             | 1,123,528 | 1,168 | n.a.   | 4,630,551  |
| <b>Beard</b>            | M  | Stage I Seminoma                           | 9,193     | 39    | n.a.   | 121,037    |
| <b>Njei</b>             | MF | Hepatocellular carcinoma                   | 51,331    | 31    | 51.40  | 60,325     |
| <b>Smailyte</b>         | MF | Multiple sites                             | 137,320   | 215   | n.a.   | 308,980    |
| <b>Urban</b>            | MF | Lung                                       | 871,230   | 1,184 | 80.90  | n.a.       |
| <b>Oberaigner</b>       | MF | All sites except non-melanoma skin cancer  | 53,803    | 144   | n.a.   | 285,038    |
| <b>Kam</b>              | MF | Head and neck                              | 350,413   | 857   | 37.86  | 2,263,376  |
| <b>Klaasen</b>          | MF | Urogenital system                          | 1,239,522 | 2,263 | n.a.   | 7,307,377  |
| <b>Vyssoki</b>          | MF | Multiple sites                             | 915,303   | 2,877 | n.a.   | 14,532,682 |
| <b>Klaasen</b>          | MF | Urothelial carcinoma                       | n.a.      | 439   | 37     | 1,178,000  |

|                       |    |                                           |           |        |        |            |
|-----------------------|----|-------------------------------------------|-----------|--------|--------|------------|
| <b>Siracuse</b>       | MF | Bone and soft tissue                      | 23,620    | 52     | 32     | 164,455    |
| <b>Sugawara</b>       | MF | Stomach                                   | 65,535    | 68     | 34.60  | 109,597    |
| <b>Bowden</b>         | MF | Stomach                                   | n.a.      | 210    | 61.02  | 344,134    |
| <b>Kaceniene</b>      | MF | Multiple sites                            | 273,511   | 654    | n.a.   | n.a.       |
| <b>Lin</b>            | MF | Multiple sites                            | 916,337   | 2,543  | 59.10  | 4,300,953  |
| <b>Simpson</b>        | M  | Penis                                     | 6,155     | 13     | 38     | 34,197     |
| <b>Kumar</b>          | MF | Multiple sites                            | 1,486,140 | 1,495  | n.a.   | 6,346,155  |
| <b>Anderson</b>       | MF | Digestive system                          | 856,293   | 881    | 32.77  | 2,688,837  |
| <b>Henson</b>         | MF | All sites except non-melanoma skin cancer | 4,722,099 | 2,491  | n.a.   | 22,036,669 |
| <b>Osazuwa-Peters</b> | MF | Head and neck                             | 287,901   | 1,036  | 100.10 | 931,349    |
| <b>Rahouma</b>        | MF | Lung, prostate, breast, colorectal        | 3,640,229 | 6,661  | 27.50  | n.a.       |
| <b>Saad</b>           | MF | Multiple sites                            | 4,671,989 | 5,007  | n.a.   | n.a.       |
| <b>Smith</b>          | M  | Prostate                                  | 51,924    | 49     | 25.00  | 196,146    |
| <b>Kaceniene</b>      | MF | Lung cancer                               | 19,781    | 41     | n.a.   | n.a.       |
| <b>Dulskas</b>        | MF | Colorectal                                | 19,409    | 67     | n.a.   | 85,506     |
| <b>Zaorsky</b>        | MF | All invasive cancers                      | 8,651,569 | 13,311 | 28.58  | n.a.       |
| <b>Abdel-Rahman</b>   | MF | Multiple sites                            | 3,149,235 | 4,382  | n.a.   | n.a.       |
| <b>Anderson</b>       | MF | Multiple sites                            | 249,021   | 540    | 17.28  | n.a.       |
| <b>Guo</b>            | MF | Kidney                                    | 171,819   | 207    | 21.83  | 948,272    |
| <b>Kim</b>            | MF | Hodgkin lymphoma                          | 12,202    | 19     | 20.01  | 94,972     |
| <b>Low</b>            | MF | Neuroendocrine tumors                     | 29,981    | 46     | n.a.   | n.a.       |
| <b>Patasius</b>       | M  | Prostate                                  | 8,908     | 49     | n.a.   | n.a.       |
| <b>Chen</b>           | MF | Hepatocellular carcinoma                  | 102,567   | 70     | 43.61  | 160,501    |
| <b>Oh</b>             | MF | Multiple sites                            | 2,707,520 | 4,350  | n.a.   | n.a.       |
| <b>Patasius</b>       | M  | Prostate                                  | 25,786    | 135    | n.a.   | n.a.       |
| <b>Ravaioli</b>       | MF | Multiple sites                            | 127,042   | 158    | 25.00  | 618,054    |
| <b>Saad</b>           | MF | Central nervous system                    | 87,785    | 64     | n.a.   | n.a.       |

|                  |    |                        |                       |               |      |                        |
|------------------|----|------------------------|-----------------------|---------------|------|------------------------|
| <b>Shen</b>      | MF | Kaposi's sarcoma       | 21,405                | 110           | n.a. | 95,396                 |
| <b>Zhai</b>      | MF | Bladder                | 24,074                | 18            | n.a. | n.a.                   |
| <b>Harashima</b> | MF | Multiple sites         | 546,148               | 145           | 36.5 | 249,116                |
|                  |    |                        |                       |               |      |                        |
|                  |    | Total study population | <b>&gt;47,035,065</b> | <b>69,401</b> |      | <b>&gt;107,961,345</b> |

**Supplementary Table 2: NOS Scores of all included studies.** Four different authors evaluated study quality according to the Newcastle-Ottawa Scale (NOS). PMID: PubMed Identification number; DOI: digital object identifier.

| <b>Newcastle-Ottawa Scale</b> |             |                                                                                                               |                                                            |                            |             |             |                        |
|-------------------------------|-------------|---------------------------------------------------------------------------------------------------------------|------------------------------------------------------------|----------------------------|-------------|-------------|------------------------|
| <b>First Author</b>           | <b>Year</b> | <b>PMID/DOI</b>                                                                                               | <b>Country</b>                                             | <b>Time of recruitment</b> | <b>M.H.</b> | <b>L.H.</b> | <b>C.S. and H.J.B.</b> |
| <b>Abdel-Rahman</b>           | 2019        | <a href="https://doi.org/10.1016/j.canep.2019.101601">https://doi.org/10.1016/j.canep.2019.101601</a>         | USA                                                        | 2000-2010                  | 8           | 7           | 9                      |
| <b>Ahn</b>                    | 2010        | 20696665                                                                                                      | Korea                                                      | 1993-2005                  | 9           | 8           | 8                      |
| <b>Alanee</b>                 | 2012        | 22624649                                                                                                      | USA                                                        | 1995-2008                  | 8           | 8           | 8                      |
| <b>Allebeck</b>               | 1989        | 2760653                                                                                                       | Sweden                                                     | 1962-1979                  | 8           | 8           | 8                      |
| <b>Allebeck</b>               | 1991        | 1780410                                                                                                       | Sweden                                                     | 1975-1985                  | 9           | 9           | 9                      |
| <b>Anderson</b>               | 2018        | 29956393                                                                                                      | USA                                                        | 2000-2014                  | 9           | 8           | 8                      |
| <b>Anderson</b>               | 2019        | 10.1002/cncr.32063                                                                                            | USA                                                        | 1973-2015                  | 8           | 8           | 9                      |
| <b>Beard</b>                  | 2013        | 23633409                                                                                                      | USA                                                        | 1973-2001                  | 8           | 8           | 8                      |
| <b>Bill-Axelsson</b>          | 2010        | 19914773                                                                                                      | Sweden                                                     | 1997-2006                  | 9           | 8           | 8                      |
| <b>Björkenstam</b>            | 2005        | 16040462                                                                                                      | Sweden                                                     | 1965-1999                  | 8           | 8           | 8                      |
| <b>Bowden</b>                 | 2017        | 29184695                                                                                                      | USA                                                        | 1973-2013                  | 9           | 8           | 9                      |
| <b>Chen</b>                   | 2020        | <a href="https://doi.org/10.1016/j.ejso.2020.10.001">https://doi.org/10.1016/j.ejso.2020.10.001</a>           | USA                                                        | 1975-2016                  | 8           | 9           | 7                      |
| <b>Crocetti</b>               | 1998        | 9569062                                                                                                       | Tuscany, Italy                                             | 1985-1994                  | 8           | 7           | 7                      |
| <b>Dormer</b>                 | 2008        | 18241168                                                                                                      | West Australia                                             | 1981–2002                  | 9           | 8           | 9                      |
| <b>Dulskas</b>                | 2019        | 30617411                                                                                                      | Lithuania                                                  | 1998-2012                  | 8           | 9           | 8                      |
| <b>Fang</b>                   | 2009        | 20124521                                                                                                      | USA                                                        | 1979-2004                  | 8           | 8           | 8                      |
| <b>Guo</b>                    | 2019        | 10.1002/cam4.2400                                                                                             | USA                                                        | 1973-2015                  | 7           | 8           | 7                      |
| <b>Harashima</b>              | 2021        | doi: 10.1093/jjco/hyab001                                                                                     | Japan                                                      | 01.01.2016-30.06.2016      | 8           | 9           | 8                      |
| <b>Hem</b>                    | 2004        | 15483032                                                                                                      | Norway                                                     | 1960-1997                  | 8           | 9           | 8                      |
| <b>Henson</b>                 | 2018        | 30476945                                                                                                      | England                                                    | 1995-2015                  | 8           | 9           | 9                      |
| <b>Innos</b>                  | 2003        | 14522382                                                                                                      | Estonia                                                    | 1983-1998                  | 8           | 8           | 8                      |
| <b>Kaceniene</b>              | 2017        | 28914692                                                                                                      | Lithuania                                                  | 1993-2012                  | 7           | 8           | 7                      |
| <b>Kaceniene</b>              | 2018        | 10.1111/crj.12916                                                                                             | Lithuania                                                  | 1998-2012                  | 8           | 7           | 9                      |
| <b>Kam</b>                    | 2015        | 26562764                                                                                                      | USA                                                        | 1973-2011                  | 9           | 8           | 9                      |
| <b>Kim</b>                    | 2019        | <a href="http://dx.doi.org/10.1097/HS9.000000000000183">http://dx.doi.org/10.1097/HS9.000000000000183</a>     | Germany, Switzerland, Netherlands, Czech Republic, Austria | 1993-2009                  | 9           | 9           | 9                      |
| <b>Klaasen</b>                | 2015        | <a href="https://doi.org/10.1002/cncr.29274">https://doi.org/10.1002/cncr.29274</a>                           | USA                                                        | 1988-2010                  | 9           | 8           | 9                      |
| <b>Klaasen</b>                | 2016        | 26680629                                                                                                      | USA                                                        | 1988-2010                  | 9           | 8           | 9                      |
| <b>Kumar</b>                  | 2017        | <a href="https://doi.org/10.1176/appi.ajp-rj.2017.120104">https://doi.org/10.1176/appi.ajp-rj.2017.120104</a> | USA                                                        | 2000-2013                  | 7           | 8           | 7                      |
| <b>Levi</b>                   | 1991        | 1987498                                                                                                       | Switzerland                                                | 1976-1987                  | 8           | 8           | 8                      |
| <b>Lin</b>                    | 2017        | 28181332                                                                                                      | Taiwan                                                     | 1985-2007                  | 7           | 8           | 8                      |
| <b>Louhivuori</b>             | 1979        | 433917                                                                                                        | Finland                                                    | 1955-1965                  | 7           | 9           | 7                      |
| <b>Low</b>                    | 2019        | DOI: 10.1097/COC.0000000000000575                                                                             | USA                                                        | 1973-2015                  | 9           | 8           | 9                      |
| <b>Mahdi</b>                  | 2011        | 21561646                                                                                                      | USA                                                        | 1988-2007                  | 9           | 8           | 8                      |

|                         |      |                                                                                                         |                                       |            |   |   |   |
|-------------------------|------|---------------------------------------------------------------------------------------------------------|---------------------------------------|------------|---|---|---|
| <b>Miccinesi</b>        | 2004 | 15093582                                                                                                | Central Italy                         | 1985-1999  | 9 | 8 | 9 |
| <b>Misono</b>           | 2008 | 18695257                                                                                                | USA                                   | 1973-2002  | 9 | 9 | 9 |
| <b>Muff-Christensen</b> | 2006 | 16679871                                                                                                | Denmark                               | 1971-1999  | 8 | 8 | 9 |
| <b>Nasseri</b>          | 2012 | <a href="https://doi.org/10.1080/13811118.2013.722056">https://doi.org/10.1080/13811118.2013.722056</a> | USA                                   | 1997-2006  | 9 | 7 | 7 |
| <b>Njei</b>             | 2013 | 368634538                                                                                               | USA                                   | 1990-2009  | 9 | 8 | 9 |
| <b>Oberaigner</b>       | 2014 | 25015541                                                                                                | Tyrol                                 | 1991-2010  | 8 | 7 | 9 |
| <b>Oh</b>               | 2020 | DOI: 10.1002/cam4.2813                                                                                  | South Korea                           | 2000-2016  | 8 | 7 | 8 |
| <b>Osazuwa-Peters</b>   | 2018 | 29884411                                                                                                | USA                                   | 1973-2014  | 9 | 8 | 9 |
| <b>Patasius</b>         | 2019 | DOI: 10.1002/pon.5186                                                                                   | Lithuania                             | 2003-2012  | 8 | 7 | 9 |
| <b>Patasius</b>         | 2020 | DOI: 10.1097/CEJ.0000000000000573                                                                       | Lithuania                             | 2000-2011  | 7 | 8 | 7 |
| <b>Rahouma</b>          | 2018 | 30174721                                                                                                | USA                                   | 1973-2013  | 9 | 8 | 9 |
| <b>Ravaioli</b>         | 2020 | <a href="https://doi.org/10.1016/j.ejca.2019.08.019">https://doi.org/10.1016/j.ejca.2019.08.019</a>     | Romagna, Italy                        | 1996-2014  | 8 | 8 | 8 |
| <b>Robinson</b>         | 2009 | 19471277                                                                                                | South East England                    | 1996-2005  | 9 | 7 | 9 |
| <b>Saad</b>             | 2018 | 30613943                                                                                                | USA                                   | 2000-2015  | 9 | 8 | 9 |
| <b>Saad</b>             | 2020 | doi:10.1001/jamanetworkopen.2020.3862                                                                   | USA                                   | 2000-2016  | 7 | 8 | 7 |
| <b>Schairer</b>         | 2006 | 17018788                                                                                                | USA, Sweden, Denmark, Finland, Norway | 1953-2001  | 8 | 9 | 9 |
| <b>Shen</b>             | 2020 | DOI: 10.12659/MSM.920711                                                                                | USA                                   | 1980-2016  | 9 | 8 | 9 |
| <b>Simpson</b>          | 2017 | 29126815                                                                                                | USA                                   | 1973 -2013 | 8 | 8 | 8 |
| <b>Siracuse</b>         | 2016 | 27896676                                                                                                | USA                                   | 1973-2013  | 8 | 9 | 9 |
| <b>Smailyte</b>         | 2013 | 23809215                                                                                                | Lithuania                             | 2001-2009  | 8 | 8 | 8 |
| <b>Smith</b>            | 2018 | 29897979                                                                                                | New South Wales, Australia            | 1997-2007  | 8 | 7 | 8 |
| <b>Sugawara</b>         | 2016 | 27307574                                                                                                | USA                                   | 1998-2011  | 8 | 9 | 9 |
| <b>Tanaka</b>           | 1999 | 10543251                                                                                                | Osaka, Japan                          | 1978-1994  | 9 | 8 | 9 |
| <b>Turaga</b>           | 2011 | 20824626                                                                                                | USA                                   | 1995-2005  | 8 | 9 | 8 |
| <b>Urban</b>            | 2013 | 23681288                                                                                                | USA                                   | 1973-2008  | 8 | 8 | 8 |
| <b>Vyssoki</b>          | 2015 | 25661393                                                                                                | Austria                               | 1983-2000  | 8 | 9 | 9 |
| <b>Yousaf</b>           | 2005 | 15756279                                                                                                | Denmark                               | 1971-2000  | 8 | 9 | 9 |
| <b>Zaorsky</b>          | 2019 | 30643135                                                                                                | USA                                   | 1973-2014  | 9 | 8 | 9 |
| <b>Zhai</b>             | 2020 | <a href="https://doi.org/10.1186/s12885-020-07655-x">https://doi.org/10.1186/s12885-020-07655-x</a>     | USA                                   | 2014-2015  | 8 | 9 | 9 |

**Supplementary Table 3: Sample sizes of subgroups analyzed in the present study.** The sample sizes represent the minimum number, as data were not available for some of the included subgroups.

|                                          | <b>N° studies</b> | <b>N° studies with available sample sizes</b> | <b>Patient sample size</b> |
|------------------------------------------|-------------------|-----------------------------------------------|----------------------------|
| <b>All studies</b>                       | 28                | 28                                            | 22,407,690                 |
| <b>Total men</b>                         | 29                | 18                                            | >9,112,332                 |
| <b>Total women</b>                       | 31                | 17                                            | >9,848,649                 |
| <b>Australia</b>                         | 2                 | 2                                             | >173,457                   |
| <b>Asia</b>                              | 4                 | 4                                             | >4,193,984                 |
| <b>Europe</b>                            | 16                | 16                                            | >8,922,075                 |
| <b>USA</b>                               | 7                 | 7                                             | >9,118,174                 |
| <b>Late stage cancer</b>                 | 12                | 6                                             | >1,824,399                 |
| <b>Early stage cancer</b>                | 12                | 6                                             | >6,286,888                 |
| <b>Recruitment after 2000</b>            | 4                 | 1                                             | >59,292                    |
| <b>Recruitment before 2000</b>           | 13                | 10                                            | >3,373,045                 |
| <b>Other ethnicity</b>                   | 4                 | 4                                             | 652,794                    |
| <b>Asian ethnicity</b>                   | 2                 | 2                                             | 58,246                     |
| <b>African-American ethnicity</b>        | 4                 | 4                                             | 925,049                    |
| <b>Caucasian ethnicity</b>               | 6                 | 6                                             | 11,007,230                 |
| <b>Unmarried cancer patients</b>         | 5                 | 3                                             | >3,323,977                 |
| <b>Married cancer patients</b>           | 5                 | 3                                             | >4,793,806                 |
| <b>Later than 1 year after diagnosis</b> | 15                | 4                                             | >5,771,651                 |
| <b>Within 1 year after diagnosis</b>     | 17                | 6                                             | >3,051,013                 |

**Supplementary Table 4: Studification matrix for comparison of the present systematic review and meta-analysis with previous meta-analyses on the topic of suicide in patients with cancer.** Entries marked in green are available for the respective meta-analysis.

| <b>Databases</b>                        | <b><u>Heinrich et al. 2022</u></b> | Harris/Barracough 1994 | Amiri et al. 2019 | Ravaioli et al. 2020 | Brunckhorst et al. 2020 | Du et al. 2020    | Guo et al. 2020   |
|-----------------------------------------|------------------------------------|------------------------|-------------------|----------------------|-------------------------|-------------------|-------------------|
| Embase (Ovid)                           | 4,724                              |                        |                   |                      |                         |                   |                   |
| MEDLINE (Ovid) / PubMed                 | 2,468                              |                        |                   |                      |                         |                   |                   |
| Web of Science                          | 1,950                              |                        |                   |                      |                         |                   |                   |
| PsycInfo (EBSCOhost)                    | 1,143                              |                        |                   |                      |                         |                   |                   |
| CINAHL (EBSCOhost)                      | 1,503                              |                        |                   |                      |                         |                   |                   |
| Google Scholar                          | 400                                |                        |                   |                      |                         |                   |                   |
| Scopus                                  |                                    |                        |                   |                      |                         |                   |                   |
| China National Knowledge Infrastructure |                                    |                        |                   |                      |                         |                   |                   |
| <b>Total records</b>                    | <b>12,193</b>                      | <b>235</b>             | <b>9,095</b>      | <b>223</b>           | <b>5,467</b>            | <b>7,381</b>      | <b>235</b>        |
| <b>Deadline for literature search</b>   | <b>2021-02-19</b>                  | <b>1992</b>            | <b>2018-07-01</b> | <b>2017-11-06</b>    | <b>2020-05-26</b>       | <b>2020-05-20</b> | <b>2020-04-30</b> |
| <b>Meta-regression analysis</b>         |                                    |                        |                   |                      |                         |                   |                   |

| <b>Risk subgroups</b> |                                 | <b><u>Heinrich et al. 2022</u></b> | Harris/Barracough 1994 | Amiri et al. 2019 | Ravaoli et al. 2020 | Brunckhorst et al. 2020 | Du et al. 2020 | Guo et al. 2020     |
|-----------------------|---------------------------------|------------------------------------|------------------------|-------------------|---------------------|-------------------------|----------------|---------------------|
| Women                 | incl. gender-specific subgroups |                                    |                        |                   |                     |                         |                |                     |
| Men                   | incl. gender-specific subgroups |                                    |                        |                   |                     |                         |                |                     |
| Cancer prognosis      |                                 |                                    |                        |                   |                     |                         |                |                     |
| Cancer stage          |                                 |                                    |                        |                   |                     |                         |                |                     |
| Cancer sites          |                                 |                                    |                        |                   |                     | Prostate cancer only    |                | Bladder cancer only |
| Asia                  |                                 |                                    |                        |                   |                     |                         |                |                     |
| Australia             |                                 |                                    |                        |                   |                     |                         |                |                     |
| Europe                |                                 |                                    |                        |                   |                     |                         |                |                     |
| USA                   |                                 |                                    |                        |                   |                     |                         |                |                     |
| Time after diagnosis  |                                 |                                    |                        |                   |                     |                         |                |                     |
| Year of recruitment   |                                 |                                    |                        |                   |                     |                         |                |                     |
| Ethnicity             |                                 |                                    |                        |                   |                     |                         |                |                     |
| Marital status        |                                 |                                    |                        |                   |                     |                         |                |                     |

| <b>Included studies</b>   | <b><u>Heinrich et al. 2022</u></b> | <b>Harris/Barracough 1994</b> | <b>Amiri et al. 2019</b> | <b>Ravaioli et al. 2020</b> | <b>Brunckhorst et al. 2020</b> | <b>Du et al. 2020</b> | <b>Guo et al. 2020</b> |
|---------------------------|------------------------------------|-------------------------------|--------------------------|-----------------------------|--------------------------------|-----------------------|------------------------|
| Abdel-Rahman et al. 2019  |                                    |                               |                          |                             |                                |                       |                        |
| Ahn et al. 2010           |                                    |                               |                          |                             |                                |                       |                        |
| Alanee et al. 2012        |                                    |                               |                          |                             |                                |                       |                        |
| Allebeck et al. 1989      |                                    |                               |                          |                             |                                |                       |                        |
| Allebeck et al. 1991      |                                    |                               |                          |                             |                                |                       |                        |
| Anderson et al. 2018      |                                    |                               |                          |                             |                                |                       |                        |
| Anderson et al. 2019      |                                    |                               |                          |                             |                                |                       |                        |
| Beard et al. 2013         |                                    |                               |                          |                             |                                |                       |                        |
| Bill-Axelsson et al. 2010 |                                    |                               |                          |                             |                                |                       |                        |
| Björkenstam et al. 2005   |                                    |                               |                          |                             |                                |                       |                        |
| Bowden et al. 2017        |                                    |                               |                          |                             |                                |                       |                        |
| Chen et al. 2020          |                                    |                               |                          |                             |                                |                       |                        |
| Crocetti et al. 1998      |                                    |                               |                          |                             |                                |                       |                        |
| Dormer et al. 2008        |                                    |                               |                          |                             |                                |                       |                        |
| Dulskas et al. 2018       |                                    |                               |                          |                             |                                |                       |                        |
| Fang et al. 2009          |                                    |                               |                          |                             |                                |                       |                        |
| Guo et al. 2019           |                                    |                               |                          |                             |                                |                       |                        |
| Harashima et al. 2021     |                                    |                               |                          |                             |                                |                       |                        |
| Hem et al. 2004           |                                    |                               |                          |                             |                                |                       |                        |
| Henson et al. 2018        |                                    |                               |                          |                             |                                |                       |                        |
| Innos et al. 2003         |                                    |                               |                          |                             |                                |                       |                        |
| Kaceniene et al. 2017     |                                    |                               |                          |                             |                                |                       |                        |
| Kaceniene et al. 2018     |                                    |                               |                          |                             |                                |                       |                        |
| Kam et al. 2015           |                                    |                               |                          |                             |                                |                       |                        |
| Kim et al 2019            |                                    |                               |                          |                             |                                |                       |                        |
| Klaasen et al. 2015       |                                    |                               |                          |                             |                                |                       |                        |
| Klaasen et al. 2016       |                                    |                               |                          |                             |                                |                       |                        |
| Kumar et al. 2017         |                                    |                               |                          |                             |                                |                       |                        |

|                              |  |  |  |  |  |  |  |
|------------------------------|--|--|--|--|--|--|--|
| Levi et al. 1991             |  |  |  |  |  |  |  |
| Lin et al. 2017              |  |  |  |  |  |  |  |
| Louhivuori et al. 1978       |  |  |  |  |  |  |  |
| Low et al 2019               |  |  |  |  |  |  |  |
| Mahdi et al. 2011            |  |  |  |  |  |  |  |
| Miccinesi et al. 2004        |  |  |  |  |  |  |  |
| Misono et al. 2008           |  |  |  |  |  |  |  |
| Muff-Christensen et al. 2006 |  |  |  |  |  |  |  |
| Nasseri et al. 2012          |  |  |  |  |  |  |  |
| Njei et al. 2013             |  |  |  |  |  |  |  |
| Oberaigner et al. 2014       |  |  |  |  |  |  |  |
| Oh et al 2020                |  |  |  |  |  |  |  |
| Osazuwa-Peters et al. 2018   |  |  |  |  |  |  |  |
| Patasius et al. 2019         |  |  |  |  |  |  |  |
| Patasius et al. 2020         |  |  |  |  |  |  |  |
| Ravaioli et al. 2020         |  |  |  |  |  |  |  |
| Rahouma et al. 2018          |  |  |  |  |  |  |  |
| Robinson et al. 2009         |  |  |  |  |  |  |  |
| Saad et al. 2019             |  |  |  |  |  |  |  |
| Saad et al. 2020             |  |  |  |  |  |  |  |
| Schairer et al. 2006         |  |  |  |  |  |  |  |
| Shen et al. 2020             |  |  |  |  |  |  |  |
| Simpson et al. 2017          |  |  |  |  |  |  |  |
| Siracuse et al. 2017         |  |  |  |  |  |  |  |
| Smailyte et al. 2013         |  |  |  |  |  |  |  |
| Smith et al. 2018            |  |  |  |  |  |  |  |
| Sugawara et al. 2016         |  |  |  |  |  |  |  |
| Tanaka et al. 1999           |  |  |  |  |  |  |  |
| Turaga et al. 2011           |  |  |  |  |  |  |  |
| Urban et al. 2013            |  |  |  |  |  |  |  |
| Vyssoki et al. 2015          |  |  |  |  |  |  |  |
| Yousaf et al. 2005           |  |  |  |  |  |  |  |
| Zaorsky et al. 2019          |  |  |  |  |  |  |  |
| Zhai et al. 2020             |  |  |  |  |  |  |  |

**Supplementary Table 5: Search strategies.** Literature search was performed according to a linear search algorithm. In a first step, the single sets were created. Subsequently, the intersection of the sets 1 and 2 and of the sets 3 and 4 was found.

### Embase (Ovid)

Database: Embase 1974 to 2021 February 17 (oemezd)

Date of last search: 2021-02-19

Records: 4,724

| # | Search                                                                                                                                                                                                                                                                                                                                           | Records   | Remarks                                        |
|---|--------------------------------------------------------------------------------------------------------------------------------------------------------------------------------------------------------------------------------------------------------------------------------------------------------------------------------------------------|-----------|------------------------------------------------|
| 1 | exp suicidal behavior/ or suicid*.ti,ab,kw. Or (parasuicid* or “para suicid*”).ti,ab,kw. Or ((deliberat* or self*) adj1 (destruct* or harm* or injur* or mutilat* or poison* or killing)).ti,ab,kw.                                                                                                                                              | 145,162   | suicide                                        |
| 2 | exp neoplasm/ or (cancer* or tumor* or tumour* or neoplas* or malignan* or carcinoma* or adenocarcinoma* or choriocarcinoma* or leukemia* or leukaemia* or metasta* or sarcoma* or teratoma* or oncolog*).ti,ab,kw.                                                                                                                              | 5,842,228 | cancer                                         |
| 3 | (prevalence or incidence or epidemiol* or survey or cohort or surveillance or “long-term” or longterm or “follow-up” or followup or case control or cross-sectional or crosssectional).ti,ab,kw. Or exp epidemiology/ or exp epidemiological data/ or observational study/ or cohort analysis/ or longitudinal study/ or exp case control study/ | 8,188,257 | epidemiological studies                        |
| 4 | 1 and 2                                                                                                                                                                                                                                                                                                                                          | 10,864    | suicide AND cancer                             |
| 5 | 3 and 4                                                                                                                                                                                                                                                                                                                                          | 5,023     | suicide AND cancer AND epidemiological studies |
| 6 | limit 5 to english language                                                                                                                                                                                                                                                                                                                      | 4,724     |                                                |

## MEDLINE (Ovid)

Database: Ovid MEDLINE® ALL 1946 to February 17, 2021 (medall)

Date of last search: 2021-02-19

Records: 2,468

| # | Search                                                                                                                                                                                                                                                                                                                                                                                                                              | Records   | Remarks                                        |
|---|-------------------------------------------------------------------------------------------------------------------------------------------------------------------------------------------------------------------------------------------------------------------------------------------------------------------------------------------------------------------------------------------------------------------------------------|-----------|------------------------------------------------|
| 1 | exp suicide/ or suicid*.ti,ab,kf. or (parasuicid* or "para suicid*").ti,ab,kf. or ((deliberat* or self*) adj1 (destruct* or harm* or injur* or mutilat* or poison* or killing)).ti,ab,kf.                                                                                                                                                                                                                                           | 108,157   | suicide                                        |
| 2 | exp neoplasms/ or (cancer* or tumor* or tumour* or neoplas* or malignan* or carcinoma* or adenocarcinoma* or choriocarcinoma* or leukemia* or leukaemia* or metasta* or sarcoma* or teratoma* or oncolog*).ti,ab,kf.                                                                                                                                                                                                                | 4,588,020 | cancer                                         |
| 3 | (prevalence or incidence or epidemiol* or survey or cohort or surveillance or "long-term" or longterm or "follow-up" or followup or case control or cross-sectional or crossectional).ti,ab,kf. or exp epidemiologic methods/ or exp epidemiologic studies/ or exp sentinel surveillance/ or exp cohort studies/ or exp cross-sectional studies/ or exp longitudinal studies/ or exp follow-up studies/ or exp prospective studies/ | 8,316,083 | epidemiological studies                        |
| 4 | 1 and 2                                                                                                                                                                                                                                                                                                                                                                                                                             | 6,507     | suicide AND cancer                             |
| 5 | 3 and 4                                                                                                                                                                                                                                                                                                                                                                                                                             | 2,726     | suicide AND cancer AND epidemiological studies |
| 6 | limit 5 to english language                                                                                                                                                                                                                                                                                                                                                                                                         | 2,468     |                                                |

## Science Citation Index Expanded & Social Sciences Citation Index (Web of Science)

Database: Science Citation Index Expanded (SCI-EXPANDED) & Social Sciences Citation

Index (SSCI); Data last updated: 2021-02-18

Date of last search: 2021-02-19

Records: 1,950

|     |           |                                                                                                                                                                                                                                                           |      |                          |                          |
|-----|-----------|-----------------------------------------------------------------------------------------------------------------------------------------------------------------------------------------------------------------------------------------------------------|------|--------------------------|--------------------------|
| # 6 | 1,950     | (#5) AND LANGUAGE: (English)<br><i>Indexes=SCI-EXPANDED, SSCI Timespan=All years</i>                                                                                                                                                                      | Edit | <input type="checkbox"/> | <input type="checkbox"/> |
| # 5 | 2,045     | #4 AND #3<br><i>Indexes=SCI-EXPANDED, SSCI Timespan=All years</i>                                                                                                                                                                                         | Edit | <input type="checkbox"/> | <input type="checkbox"/> |
| # 4 | 7,405     | #2 AND #1<br><i>Indexes=SCI-EXPANDED, SSCI Timespan=All years</i>                                                                                                                                                                                         | Edit | <input type="checkbox"/> | <input type="checkbox"/> |
| # 3 | 5,093,657 | TS=(prevalence or incidence or epidemiol* or survey or cohort or surveillance or "long-term" or longterm or "follow-up" or followup or "case-control" or cross-sectional or crosssectional)<br><i>Indexes=SCI-EXPANDED, SSCI Timespan=All years</i>       | Edit | <input type="checkbox"/> | <input type="checkbox"/> |
| # 2 | 4,319,340 | (TS=(cancer* or tumor* or tumour* or neoplas* or malignan* or carcinoma* or adenocarcinoma* or choriocarcinoma* or leukemia* or leukaemia* or metasta* or sarcoma* or teratoma* or oncolog*)<br>)<br><i>Indexes=SCI-EXPANDED, SSCI Timespan=All years</i> | Edit | <input type="checkbox"/> | <input type="checkbox"/> |
| # 1 | 102,917   | (TS=(suicid*)) OR (TS=(parasuicid* or "para suicid**")) OR (TS=((deliberat* or self*) NEAR/0 (destruct* or harm* or injur* or mutilat* or poison* or killing)<br>)<br><i>Indexes=SCI-EXPANDED, SSCI Timespan=All years</i>                                | Edit | <input type="checkbox"/> | <input type="checkbox"/> |

AND  OR

### PsycInfo (EBSCOhost)

Database: APA PsycInfo (psyh)

Date of last search: 2021-02-19

Records: 1,143

| #  | Query               | Limiters/Expanders               | Last Run Via                                                                                                          | Records |
|----|---------------------|----------------------------------|-----------------------------------------------------------------------------------------------------------------------|---------|
| S4 | S3 AND (LA english) | Search modes -<br>Boolean/Phrase | Interface -<br>EBSCOhost<br>Research<br>Databases<br>Search Screen -<br>Advanced<br>Search Database<br>- APA PsycInfo | 1,143   |
| S3 | S1 AND S2           | Search modes -<br>Boolean/Phrase | Interface -<br>EBSCOhost<br>Research<br>Databases<br>Search Screen -<br>Advanced<br>Search Database<br>- APA PsycInfo | 1,223   |

|    |                                                                                                                                                                                                                                                                                                                                                                                                                                                                                                                                                                                                                                                        |                               |                                                                                                  |        |
|----|--------------------------------------------------------------------------------------------------------------------------------------------------------------------------------------------------------------------------------------------------------------------------------------------------------------------------------------------------------------------------------------------------------------------------------------------------------------------------------------------------------------------------------------------------------------------------------------------------------------------------------------------------------|-------------------------------|--------------------------------------------------------------------------------------------------|--------|
| S2 | (DE "Neoplasms" OR DE "Benign Neoplasms" OR DE "Breast Neoplasms" OR DE "Endocrine Neoplasms" OR DE "Leukemias" OR DE "Melanoma" OR DE "Metastasis" OR DE "Nervous System Neoplasms" OR DE "Terminal Cancer" OR DE "Brain Neoplasms" OR DE "Glioma") OR (TI (cancer* OR tumor* OR tumour* OR neoplas* OR malignan* OR carcinoma* OR adenocarcinoma* OR choriocarcinoma* OR leukemia* OR leukaemia* OR metasta* OR sarcoma* OR teratoma* OR oncolog*)) OR (AB (cancer* OR tumor* OR tumour* OR neoplas* OR malignan* OR carcinoma* OR adenocarcinoma* OR choriocarcinoma* OR leukemia* OR leukaemia* OR metasta* OR sarcoma* OR teratoma* OR oncolog*)) | Search modes - Boolean/Phrase | Interface - EBSCOhost Research Databases Search Screen - Advanced Search Database - APA PsycInfo | 89,702 |
| S1 | (DE "Suicidal Ideation" OR DE "Suicidality" OR DE "Suicide" OR DE "Attempted Suicide" OR DE "Suicidality" OR DE "Suicide Prevention") OR (TI (suicid* OR parasuicid* or "para suicid*")) OR (AB (suicid* OR parasuicid* or "para suicid*")) OR (TI ((deliberat* or self*) W0 (destruct* or harm* or injur* or mutilat* or poison* or killing))) OR (AB ((deliberat* or self*) W0 (destruct* or harm* or injur* or mutilat* or poison* or killing)))                                                                                                                                                                                                    | Search modes - Boolean/Phrase | Interface - EBSCOhost Research Databases Search Screen - Advanced Search Database - APA PsycInfo | 77,202 |

**CINAHL (EBSCOhost)**

Database: CINAHL (cin20)

Date of last search: 2021-02-22

Records: 1,503

| #  | Query                                                                                                                                                                                                                                                                                                                                                                                                               | Limiters/Expanders               | Last Run Via                                                                                                    | Records |
|----|---------------------------------------------------------------------------------------------------------------------------------------------------------------------------------------------------------------------------------------------------------------------------------------------------------------------------------------------------------------------------------------------------------------------|----------------------------------|-----------------------------------------------------------------------------------------------------------------|---------|
| S4 | S3 AND (LA english)                                                                                                                                                                                                                                                                                                                                                                                                 | Search modes -<br>Boolean/Phrase | Interface -<br>EBSCOhost<br>Research<br>Databases<br>Search Screen -<br>Advanced<br>Search Database<br>- CINAHL | 1,503   |
| S3 | S1 AND S2                                                                                                                                                                                                                                                                                                                                                                                                           | Search modes -<br>Boolean/Phrase | Interface -<br>EBSCOhost<br>Research<br>Databases<br>Search Screen -<br>Advanced<br>Search Database<br>- CINAHL | 1,521   |
| S2 | (MH "Neoplasms+") OR (TI (cancer* OR tumor* OR tumour* OR neoplas* OR malignan* OR carcinoma* OR adenocarcinoma* OR choriocarcinoma* OR leukemia* OR leukaemia* OR metasta* OR sarcoma* OR teratoma* OR oncolog*)) OR (AB (cancer* OR tumor* OR tumour* OR neoplas* OR malignan* OR carcinoma* OR adenocarcinoma* OR choriocarcinoma* OR leukemia* OR leukaemia* OR metasta* OR sarcoma* OR teratoma* OR oncolog*)) | Search modes -<br>Boolean/Phrase | Interface -<br>EBSCOhost<br>Research<br>Databases<br>Search Screen -<br>Advanced<br>Search Database<br>- CINAHL | 776,019 |

|    |                                                                                                                                                                                                                                                                                                                                                                                                                                                                                 |                               |                                                                                            |        |
|----|---------------------------------------------------------------------------------------------------------------------------------------------------------------------------------------------------------------------------------------------------------------------------------------------------------------------------------------------------------------------------------------------------------------------------------------------------------------------------------|-------------------------------|--------------------------------------------------------------------------------------------|--------|
| S1 | (MH "Suicide+") OR (MH "Suicide Prevention (Iowa NIC)") OR (MH "Suicide Risk (Saba CCC)") OR (MH "Suicide Self-Restraint (Iowa NOC)") OR (MH "Suicide, Assisted") OR (TI (suicid* OR parasuicid* OR "para suicid*")) OR (AB (suicid* OR parasuicid* OR "para suicid*")) OR (TI ((deliberat* OR self*) W0 (destruct* OR harm* OR injur* OR mutilat* OR poison* OR killing))) OR (AB ((deliberat* OR self*) W0 (destruct* OR harm* OR injur* OR mutilat* OR poison* OR killing))) | Search modes - Boolean/Phrase | Interface - EBSCOhost Research Databases Search Screen - Advanced Search Database - CINAHL | 47,004 |
|----|---------------------------------------------------------------------------------------------------------------------------------------------------------------------------------------------------------------------------------------------------------------------------------------------------------------------------------------------------------------------------------------------------------------------------------------------------------------------------------|-------------------------------|--------------------------------------------------------------------------------------------|--------|

## Google Scholar

Database: Google Scholar

Date of last search: 2021-02-19

Records: 400 (only the first 200 records (ranked by relevance) were exported during searches in 2019 and 2021)

The search was conducted using the program "Harzing's Publish or Perish", Version 7.29.3156 while having a German IP address. The search string was entered in the program's field "Keywords". This yielded the same ranking of records as when entering the search string in the simple search field in the web browser.

Search string:

(suicide|parasuicide|"self OR deliberate killing OR harm OR destruction OR poisoning")(cancer|carcinoma|adenocarcinoma|tumor|malignant|metastasis|leukemia)(prevalence|incidence|cohort|epidemiology|case-control|cross-sectional)

**Supplementary Table 6: PRISMA-S Checklist** <sup>16</sup>

| Section/to pic                         | #  | Checklist item                                                                                                                                                                                                                                                     | Location(s) Reported                                                  |
|----------------------------------------|----|--------------------------------------------------------------------------------------------------------------------------------------------------------------------------------------------------------------------------------------------------------------------|-----------------------------------------------------------------------|
| <b>INFORMATION SOURCES AND METHODS</b> |    |                                                                                                                                                                                                                                                                    |                                                                       |
| Database name                          | 1  | Name each individual database searched, stating the platform for each.                                                                                                                                                                                             | Subjects and Methods - Literature search and data sources             |
| Multi-database searching               | 2  | If databases were searched simultaneously on a single platform, state the name of the platform, listing all of the databases searched.                                                                                                                             | Subjects and Methods - Literature search and data sources             |
| Study registries                       | 3  | List any study registries searched.                                                                                                                                                                                                                                | Supplement: Materials and Methods Literature search and data source   |
| Online resources and browsing          | 4  | Describe any online or print source purposefully searched or browsed (e.g., tables of contents, print conference proceedings, web sites), and how this was done.                                                                                                   | Supplement: Materials and Methods Literature search and data source   |
| Citation searching                     | 5  | Indicate whether cited references or citing references were examined, and describe any methods used for locating cited/citing references (e.g., browsing reference lists, using a citation index, setting up email alerts for references citing included studies). | Supplement: Materials and Methods Literature search and data source   |
| Contacts                               | 6  | Indicate whether additional studies or data were sought by contacting authors, experts, manufacturers, or others.                                                                                                                                                  | Supplement: Materials and Methods Literature search and data sources. |
| Other methods                          | 7  | Describe any additional information sources or search methods used.                                                                                                                                                                                                | Supplement: Materials and Methods Literature search and data sources  |
| <b>SEARCH STRATEGIES</b>               |    |                                                                                                                                                                                                                                                                    |                                                                       |
| Full search strategies                 | 8  | Include the search strategies for each database and information source, copied and pasted exactly as run.                                                                                                                                                          | Supplement: Supplementary Table 5                                     |
| Limits and restrictions                | 9  | Specify that no limits were used, or describe any limits or restrictions applied to a search (e.g., date or time period, language, study design) and provide justification for their use.                                                                          | Supplement: Materials and Methods Literature search and data sources  |
| Search filters                         | 10 | Indicate whether published search filters were used (as originally designed or modified), and if so, cite the filter(s) used.                                                                                                                                      | Supplement: Materials and Methods Literature search and data sources  |
| Prior work                             | 11 | Indicate when search strategies from other literature reviews were adapted or reused for a substantive part or all of the search, citing the previous review(s).                                                                                                   | Supplement: Materials and Methods Literature search and data sources  |
| Updates                                | 12 | Report the methods used to update the search(es) (e.g., rerunning searches, email alerts).                                                                                                                                                                         | Supplement: Materials and Methods Literature search and data sources  |
| Dates of searches                      | 13 | For each search strategy, provide the date when the last search occurred.                                                                                                                                                                                          | Supplement: Supplementary Table 5                                     |

| <b>PEER REVIEW</b>      |    |                                                                                                                                    |                                                                                     |
|-------------------------|----|------------------------------------------------------------------------------------------------------------------------------------|-------------------------------------------------------------------------------------|
| Peer review             | 14 | Describe any search peer review process.                                                                                           | Supplement: Materials and Methods Literature search and data sources                |
| <b>MANAGING RECORDS</b> |    |                                                                                                                                    |                                                                                     |
| Total Records           | 15 | Document the total number of records identified from each database and other information sources.                                  | 12,193                                                                              |
| Deduplication           | 16 | Describe the processes and any software used to deduplicate records from multiple database searches and other information sources. | Supplement: Materials and Methods - Data extraction and assessment of study quality |

## References

1. Harrod CS, Goss CW, Stallones L, DiGuseppi C. Interventions for primary prevention of suicide in university and other post-secondary educational settings. *Cochrane Database Syst Rev* 2014; 29(10):CD009439. doi: 10.1002/14651858.CD009439.pub2
2. Hawton K, Witt KG, Taylor Salisbury TL, et al. Psychosocial interventions for self-harm in adults. *Cochrane Database Syst Rev* 2016; 2016(5):CD012189. doi: 10.1002/14651858.CD012189
3. John A, Hawton K, Okolie C, Dennis M, Price SF, Lloyd K. Means restriction for the prevention of suicide: generic protocol. *Cochrane Database of Systematic Reviews* 2018; 8(10):e022762. doi: 10.1136/bmjopen-2018-022762
4. Ostuzzi G, Matcham F, Dauchy S, Barbui C, Hotopf M. Antidepressants for the treatment of depression in people with cancer. *Cochrane Database of Systematic Reviews* 2018; 4:CD011006. doi: 10.1002/14651858.CD011006.pub3
5. Larney S, Kopinski H, Beckwith CG, et al. Incidence and prevalence of hepatitis C in prisons and other closed settings: results of a systematic review and meta-analysis. *Hepatology* 2013; 58(4): 1215-24. doi: 10.1002/hep.26387
6. McGowan J, Sampson M, Salzwedel DM, Cogo E, Foerster V, Lefebvre C. PRESS Peer Review of Electronic Search Strategies: 2015 Guideline Statement. *J Clin Epidemiol* 2016; 75: 40-6. doi: 10.1016/j.jclinepi.2016.01.021
7. Bramer WM, Giustini D, de Jonge GB, Holland L, Bekhuis T. De-duplication of database search results for systematic reviews in EndNote. *J Med Libr Assoc* 2016; 104(3): 240-3. doi: 10.3163/1536-5050.104.3.014
8. Falzone L, Salomone S, Libra M. Evolution of Cancer Pharmacological Treatments at the Turn of the Third Millennium. *Front Pharmacol* 2018; 9: 1300. doi: 10.3389/fphar.2018.01300
9. Benjamini Y, Hochberg Y. Controlling the False Discovery Rate: A Practical and Powerful Approach to Multiple Testing. *Journal of the Royal Statistical Society Series B (Methodological)* 1995; 57(1): 289-300.
10. Cohen GR, Yang SY. Mid-P confidence intervals for the Poisson expectation. *Stat Med* 1994; 13(21): 2189-203. doi: 10.1002/sim.4780132102
11. R Core Team (2020). R: A language and environment for statistical computing. . Vienna, Austria: Foundation for Statistical Computing; 2020.
12. Viechtbauer W. Conducting Meta-Analyses in R with the metafor Package. 2010 2010; 36(3): 48. doi: 10.18637/jss.v036.i03
13. Begg CB, Mazumdar M. Operating characteristics of a rank correlation test for publication bias. *Biometrics* 1994; 50(4): 1088-101.
14. Egger M, Davey Smith G, Schneider M, Minder C. Bias in meta-analysis detected by a simple, graphical test. *BMJ* 1997; 315(7109): 629-34. doi: 10.1136/bmj.315.7109.629
15. VanderWeele TJ, Ding P. Sensitivity Analysis in Observational Research: Introducing the E-Value. *Ann Intern Med* 2017; 167(4): 268-74. doi: 10.7326/M16-2607
16. Rethlefsen ML, Kirtley S, Waffenschmidt S, et al. PRISMA-S: an extension to the PRISMA Statement for Reporting Literature Searches in Systematic Reviews. *Syst Rev* 2021; 10(1): 39. doi: 10.1186/s13643-020-01542-z
